# Supplementary material for: Collateral transgression of planetary boundaries due to climate engineering by terrestrial carbon dioxide removal
Source: Copernicus journal article supplement (doi:10.5194/esd-2016-22), 2016-05-17
Supplement: Supplementary file [file esd-2016-22-AC1-supplement.pdf]

## Response to Steven Lade (referee #1)

*We thank Steven Lade for his constructive review which will help us to improve the manuscript! Following the procedures of Earth System Dynamics, we will take the reviewer comments into consideration in a revised manuscript as follows if the editor approves submission of a revised paper:*

### **Referee:**

In this paper, the authors extend a stylised carbon cycle model to include climate engineering by terrestrial carbon dioxide removal (tCDR). The modelling is technically rigorous and the paper is clearly written. There are clear advances in including climate-society feedbacks in a dynamical model and in the methods of analysis.

My main suggestion is that I would like to see more concrete conclusions, for example about the likely effectiveness of tCDR and/or about what insights this modelling approach achieved (or even why this modelling approach was chosen). Most of the statements in the abstract and the conclusion are rather empty (e.g. the results of tCDR depends on its parameters; there are trade-offs) or at best could also be obtained by simple accounting of carbon stocks or emission rates.

To my mind the main advantages of a stylised dynamical model over simple carbon stock accounting are if the system under consideration has feedbacks or time lags or non-linearities that are crucial to understanding its dynamics. Perhaps this is true in the present case but I don't see it yet, at least not in your main conclusions. Can you see any consequences of dynamics on whether tCDR is likely to succeed (in keeping the earth system within, or moving it into, the SOS)? What is the time horizon on which tCDR has to start? How likely is it that tCDR will cause at least one PB to be transgressed?

### *Reply:*

*The transient transgression of planetary boundaries can only be simulated with a dynamic model. This is why we used the modelling approach developed by Anderies et al 2013 which was specifically developed for application in the context of planetary boundaries. We will edit the manuscript to emphasize the relevance of the societal feedback to the atmosphere (i.e. monitoring atmospheric carbon -> action thereon in form of tCDR -> atmospheric and other carbon compartments' response -> monitoring atmospheric carbon).*

*Reliable assessments of the likely 'real-world' effectiveness of tCDR (and the required time horizon) are not achievable with this conceptual model. Our approach was rather meant to analyse the dynamic interaction of the societal feedback and carbon pools in a planetary boundaries context. However, our constrained basin stability based approach allows an estimation of tCDR effectiveness via the size of the manageable core of the SOS (MCSOS). In the abstract and conclusions of the manuscript, we will put more emphasis on the fact that our conceptual modelling results suggest that tCDR could only successfully be deployed as part of a strong climate change mitigation scenario and is not likely to be effective in a business-as-usual or climate emergency scenario. We will add the conclusion that in light of numerous economically based integrated assessment studies on tCDR, it is of special importance to note that societal focus on climate change only is likely to come at large costs to the biosphere.*

## Minor comments

- Line 132: It's the difference in partial pressures, not the pool size, that determines atmosphere-ocean flux

*Reply: In the model, the rate of ocean-atmosphere diffusion is approximated as being proportional to the difference in size of the atmospheric carbon pool and the maritime carbon pool. We will change Line 132 to emphasize that the dependence on carbon pool size is an assumption of the model which does not simulate carbon concentrations. (The validity of this assumption is discussed in the Appendix 4 of Anderies et al.)*

- Motivations of changes to Anderies et al.'s assumptions are clearly given, but what about discussing the validity of their assumptions and simplifications that haven't been changed? For example, the linear carbon-temperature relationship, and the single terrestrial and marine carbon stocks (which combine above and below ground and surface and deep ocean stocks, respectively).

*Reply: In the methods section we will add information about existing simplifications of the model such as the single terrestrial and maritime carbon pools. Only the upper ocean carbon pool is included because the movement of carbon into the deep ocean occurs on longer timescales relative to those of interest, as discussed by Anderies et al. The single land carbon pool is motivated by a simple proportional partitioning of aboveground and belowground carbon pools (Anderies et al.) These simplifications have been adopted, because they reduce the number of state variables and we were able to qualitatively reproduce the dynamics of observed carbon pool evolution with the model. Within the scope of our study, the addition of two more dimensions to include above and belowground terrestrial carbon and surface and deep ocean carbon would not have been feasible.*

- Lines 164-165: Why correct for carbon dioxide dynamics on long time scales? ("50% of the emitted carbon stays in the atmosphere")? Processes removing atmospheric carbon are already represented in the model. I would have thought temperature response to emissions on short time scales would have been more appropriate here. Long-time dynamics will emerge from the model.

*Reply: Thank you for pointing this out, the calibration was described in a misleading way. In the model the temperature is linearly dependent on atmospheric carbon content  $T(C_a)$ . For the calibration, however, we used the transient response of temperature to cumulative emissions (TRCE) (i.e. a linear relationship of temperature to cumulative emissions of  $2K/1000GtC$ ). We transformed this (under the assumption that 50% of emitted carbon stay in the atmosphere) to the warming rate of  $2K/(500GtC$  in the atmosphere) for the calibration of  $T(C_a)$  instead of  $T(\text{cumulative emissions})$ . We will rewrite this in the final manuscript.*

- I realise you probably don't have control over this, but I would have preferred Table 2 at the section of section 2.2 rather than several pages later.

*Reply: We agree with the referee and would move Table 2 to the end of Section 2.2*

- Figure 4 is somewhat misleading. It suggests that the terrestrial biosphere will store carbon all the way to arbitrarily high atmospheric carbon concentrations. But in your model, above a certain concentration the temperature will be high enough for respiration to exceed photosynthesis and you will have zero carbon storage.

*Reply: Whether the land system acts as a sink or as a source is only governed by the net flux of photosynthesis and respiration (Eq. 6). In turn, the terrestrial carbon carrying capacity (depicted Figure 4) determines the maximum capacity of the system to store carbon. We will clarify this in the manuscript.*

- Line 205-6: Check grammar here.

*Reply: Thank you for the hint!*

- Line 215: The planetary boundary is 350ppm (Steffen, 2015). The range 350-450ppm is the 'zone of uncertainty' of the threshold at which dangerous consequences may start to happen. Therefore we have already exceeded the climate change planetary boundary, unlike what is written here and is presented in the figures.

*Reply: For this study, we used the mean of the uncertainty range (350-450ppm) as boundary value because critical atmospheric thresholds are likely to be located somewhere within the uncertainty range. Our results are qualitatively robust with respect to choice of the threshold values. We will add to the manuscript that the actual proposed boundary is located at 350 ppm.*

- Line 222: Would appreciate being a little more explicit about how the number 0.31 is obtained.

*Reply: Unfortunately, it is not possible to derive or approximate ocean acidification solely from maritime carbon content because it largely depends on chemical variables such as pH-value, ocean alkalinity, dissolved inorganic carbon, etc. that are not included in the model. Therefore we are only able to do a very simple estimation that the boundary is located at ocean carbon pools about 5% higher than current carbon pools in the upper ocean. However, the exact location and normalisation of the boundaries is not decisive for our results and slightly different sets of planetary boundaries would not qualitatively change the systemic effects reported in this study.*

- Line 225-7: I have no problem with this reasoning, but maybe be explicit about the assumptions on soil carbon. I guess the assumption is that soil carbon is unchanged by deforestation? Is this reasonable?

*Reply: We will be more explicit on the assumptions in the revised manuscript. In detail (which is not represented in the model), the global land carbon pool consists of soil and vegetation carbon of both, forests and savannah, grasslands, croplands. For our calculation of the planetary boundary of land system change (allowing 25% vegetation carbon loss) on the one hand 'neglects' vegetation carbon of all other biomes than forest biomes, while at the same time neglecting soil carbon changes by deforestation (which would occur to some extent (Heck et al. 2016)). Thus, we do not assume zero soil carbon losses from deforestation but rather approximate that soil carbon losses are of the same order of magnitude as the 'neglected' vegetation carbon of non-forest biomes.*

- Figure 8: Interesting that in (b) and (c) the parameter on the vertical axis needs to be within a narrow parameter range. Why?

*Reply: Thank you for pointing out that a discussion of this important finding was missing in this part of the manuscript. The narrow range of tCDR implementation thresholds is due to the dynamic feedbacks of the model. As explained in Section 3.3 (for a fixed tCDR rate), thresholds higher than the atmospheric carbon boundary (0.21) are not sufficient in preventing a boundary transgression in a medium emission scenario, as tCDR action would start too late to prevent a transgression. This determines the upper parameter range (around 0.21). However, 0.21 is not a clear cut-off value but tCDR thresholds allowing for the existence of the MCSOS still depend on the tCDR rate; for relatively small tCDR rates a lower threshold is required than for large tCDR rates. The lower range of the tCDR threshold can be explained by the carbon dynamics of the model. As explained in Section 3.3. the MCSOS can not be sustained if tCDR thresholds are too small because of a resulting transgression of the land system change boundary. From Fig. 8 it becomes apparent that the range of tCDR thresholds depends on the tCDR rate.*

*We will discuss this in the revised manuscript.*

- Line 423: The success of a climate intervention “nonlinearly depends” on tCDR effectiveness. This is not surprising; when the aim is to avoid a threshold (a planetary boundary), of course success will be very sensitive to parameters in the vicinity of the threshold. Or is there some other effect you’re referring to?

*Reply: Yes, on the one hand there is the obvious nonlinearity in the vicinity of the planetary boundary but as explained in the reply to the previous comment there is also the nonlinear feedback of the terrestrial carbon pool transgression. We will also make this point clearer in the conclusion.*
